# Supplementary material for: Sex pilus specific bacteriophage to drive bacterial population towards antibiotic sensitivity
Source: PubMed Central journal article supplement (PMC6717204; doi:10.1038/s41598-019-48483-9), 2019-08-30
Supplement: 41598_2019_48483_MOESM1_ESM.pdf [file 41598_2019_48483_MOESM1_ESM.pdf]

**Sex pilus specific bacteriophage to drive bacterial population towards antibiotic sensitivity.**

Joan Colom<sup>1</sup>, Diego Batista<sup>2</sup>, Abiyad Baig<sup>1</sup>, Ying Tang<sup>1</sup>, Siyang Liu<sup>1</sup>, Fangzhong Yuan<sup>1</sup>, Aouatif Belkhiri<sup>1</sup>, Lucas Marcelino<sup>2</sup>, Fernanda Barbosa<sup>2</sup>, Marcela Rubio<sup>2</sup>, Robert Atterbury<sup>1</sup>, Angelo Berchieri<sup>2</sup> and Paul Barrow<sup>1\*</sup>.

<sup>1</sup>School of Veterinary Medicine and Science, University of Nottingham, Sutton Bonington, Leicestershire, LE12 5RD UK.

<sup>2</sup>School of Agricultural and Veterinary Sciences, São Paulo State University (FCAV/UNESP), São Paulo, 14884-900, Brazil.

\* Corresponding author

E-mail: Paul.barrow@nottingham.ac.uk

Phone: +44 115 951 6428

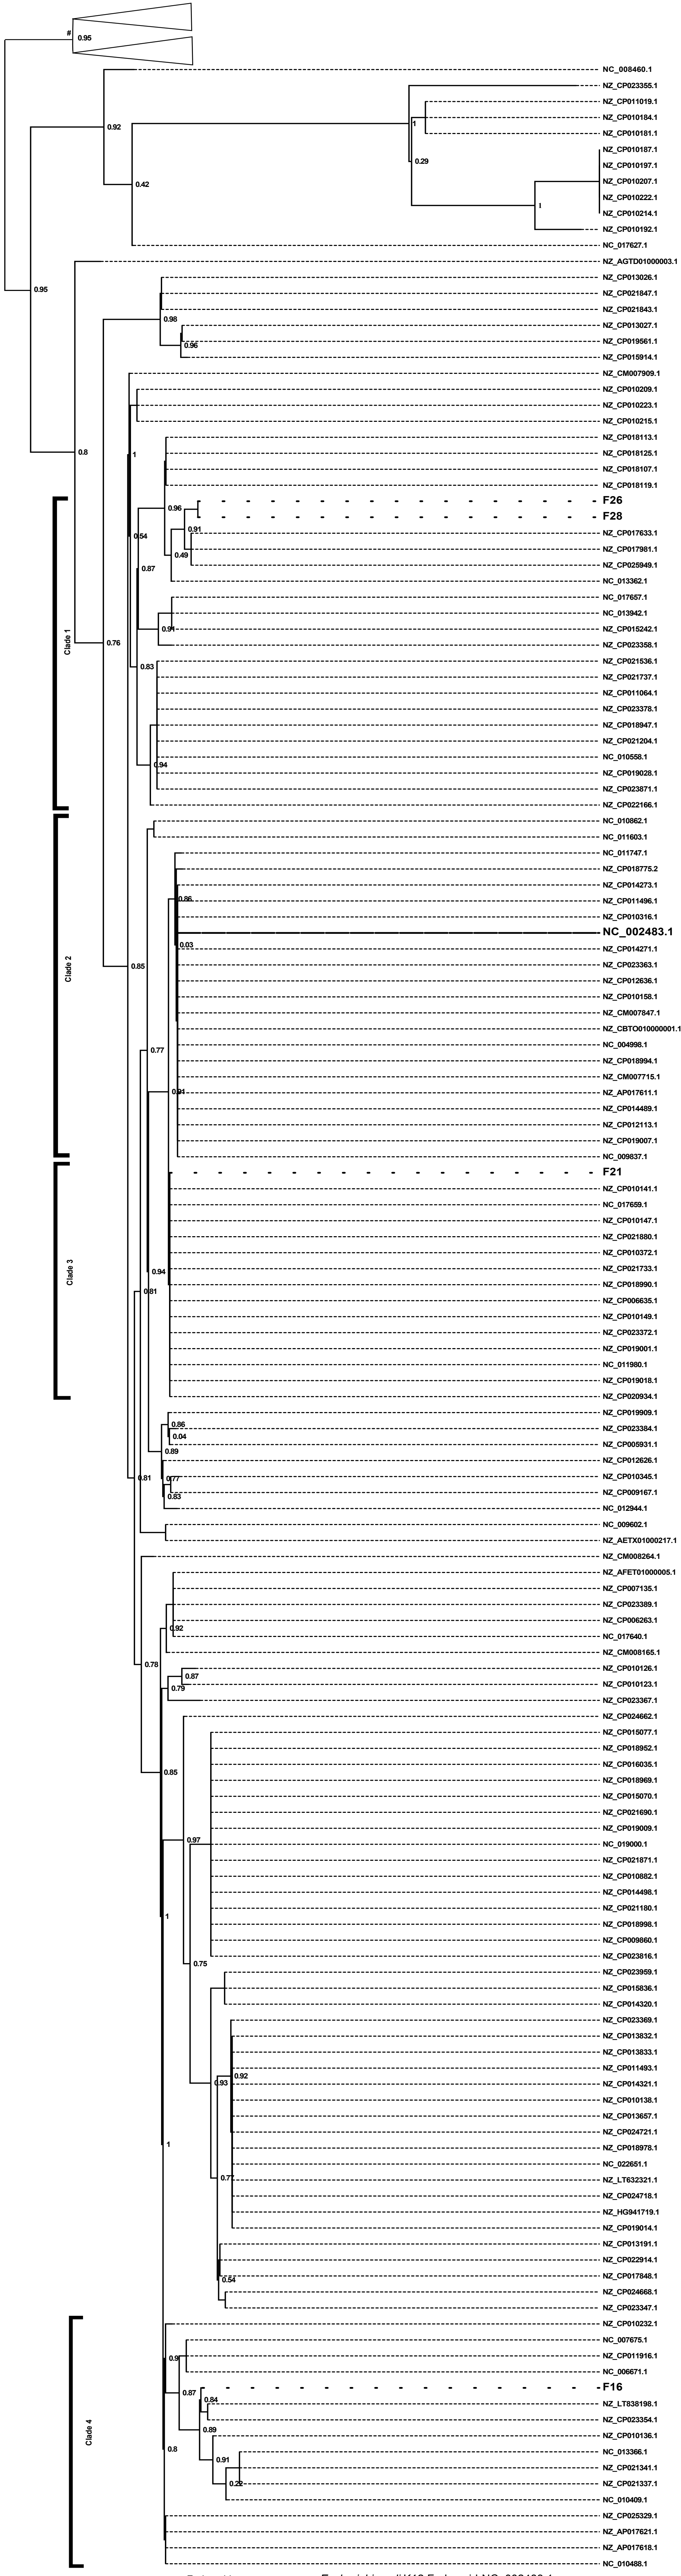

Figure S1. The maximum likelihood comparison of the nucleotide sequences of *traA* from F-plasmids present in *E. coli* and *E. faecalis* strains.

#Clades collapsed for the clarity of the presentation are the *traA* sequences from published plasmids distantly related to the F-plasmids in this study.
